# Supplementary material
Source: PubMed Central journal article supplement (PMC3288172)

A

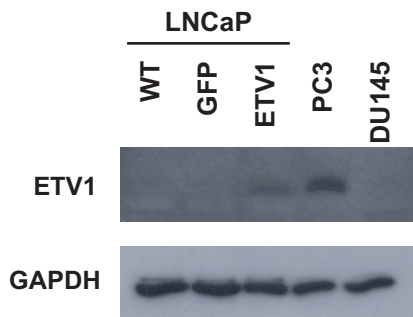

Ba

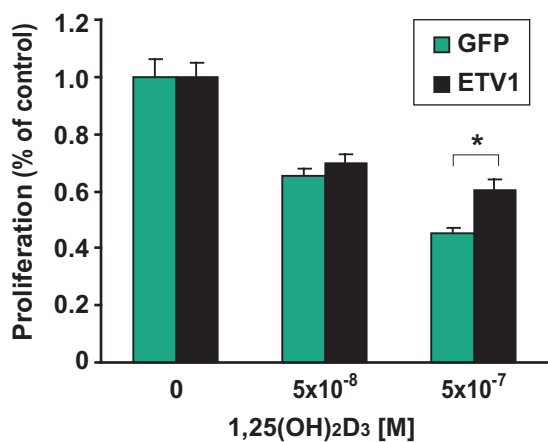

Bb

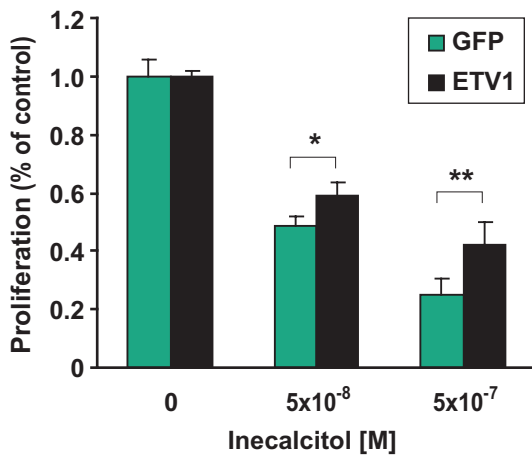

Ca

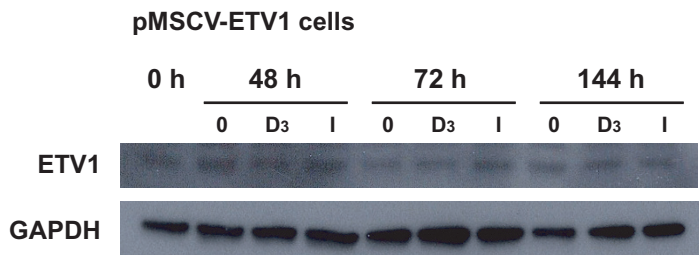

Cb

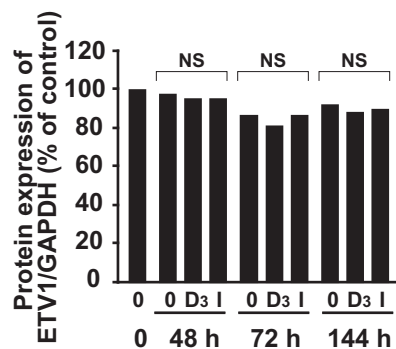

Da

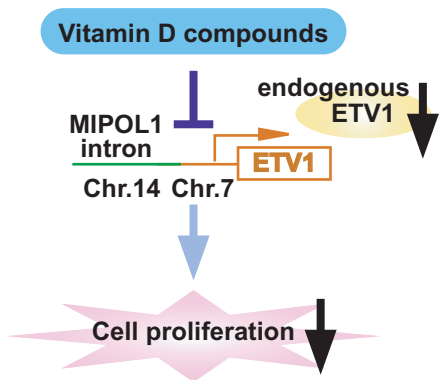

Db

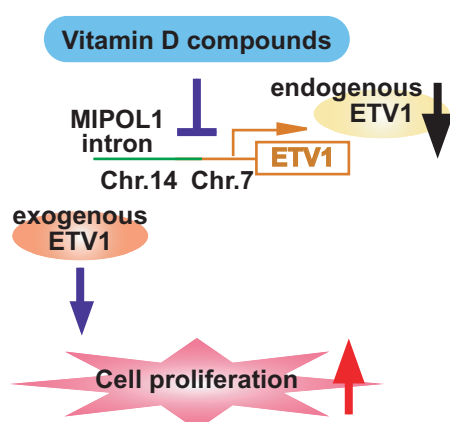

Supplement: NIHMS327716-supplement-Supp_Fig_S1.pdf [file NIHMS327716-supplement-Supp_Fig_S1.pdf]

**Fig. 2S**

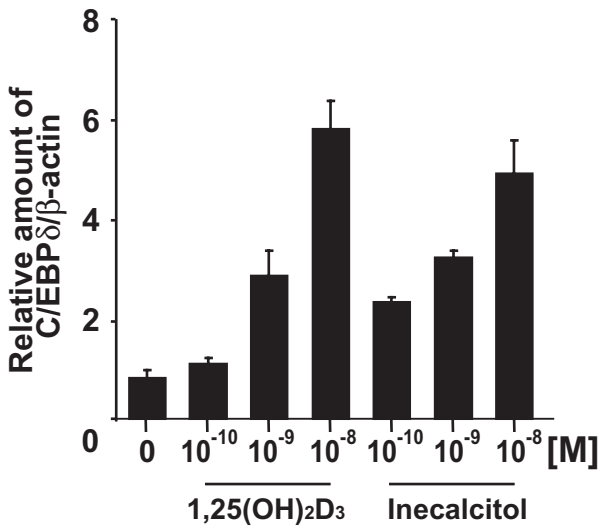

Supplement: NIHMS327716-supplement-Supp_Fig_S2.pdf [file NIHMS327716-supplement-Supp_Fig_S2.pdf]

Aa

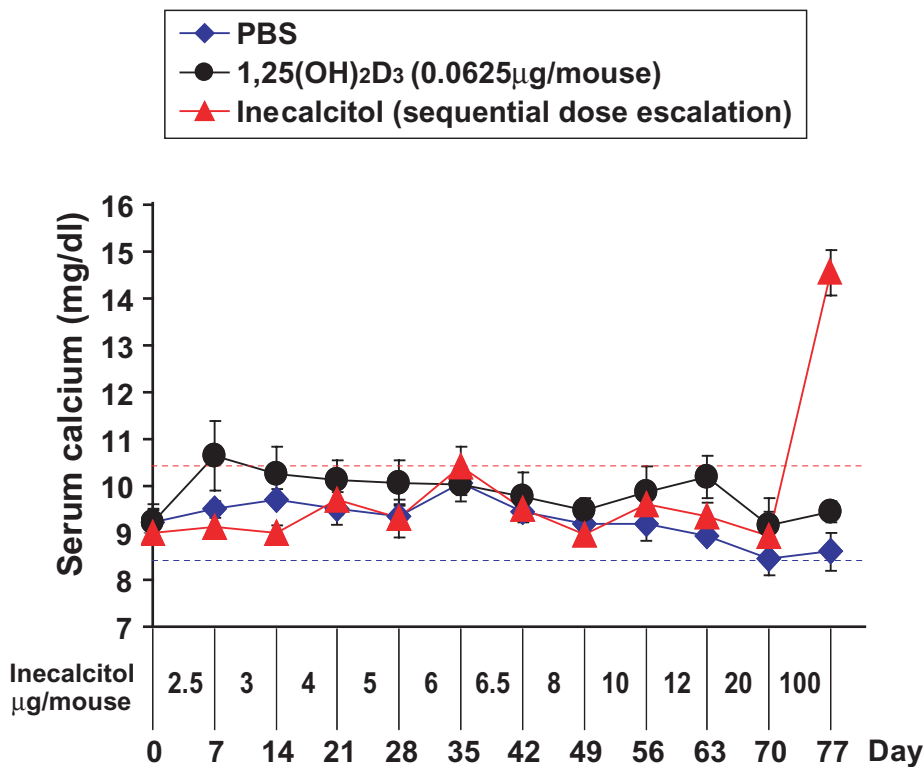

Ab

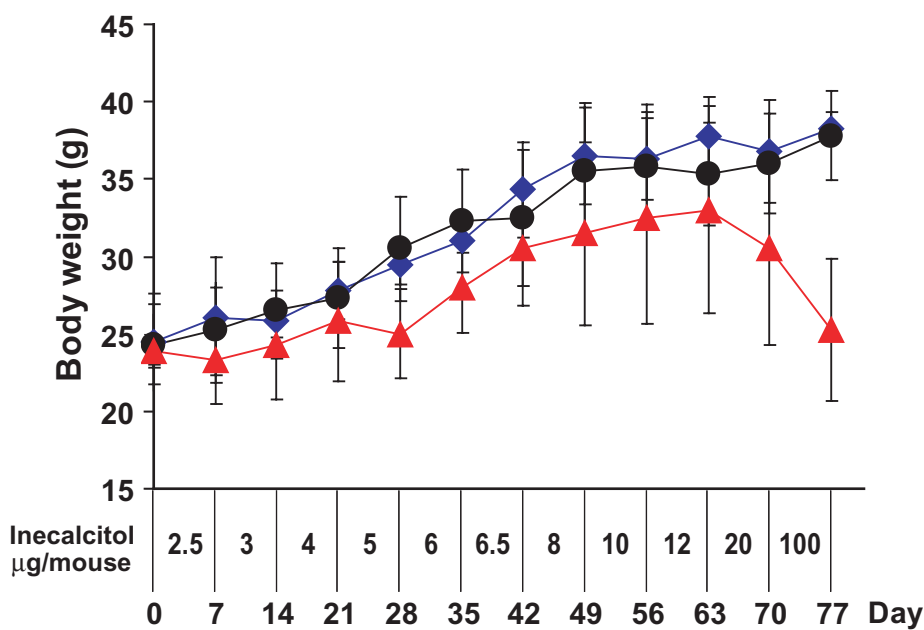

Supplement: NIHMS327716-supplement-Supp_Fig_S3.pdf [file NIHMS327716-supplement-Supp_Fig_S3.pdf]

A

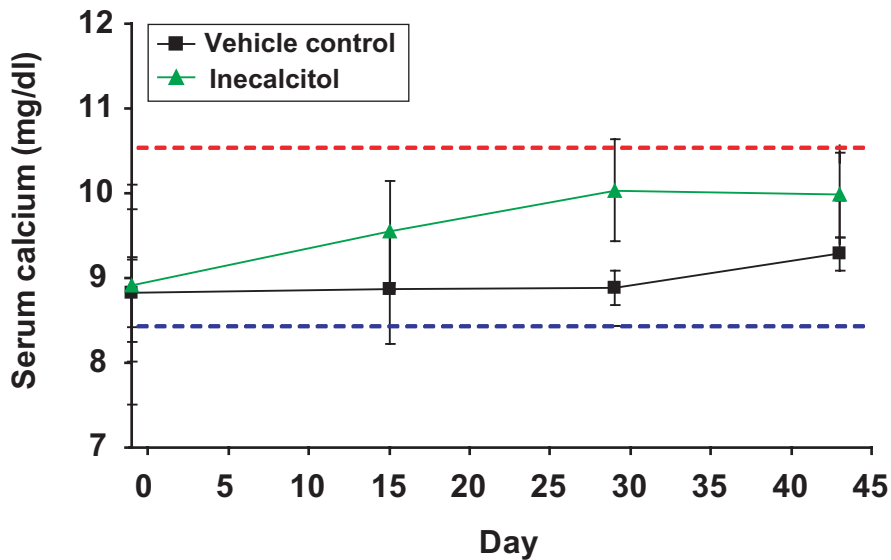

B

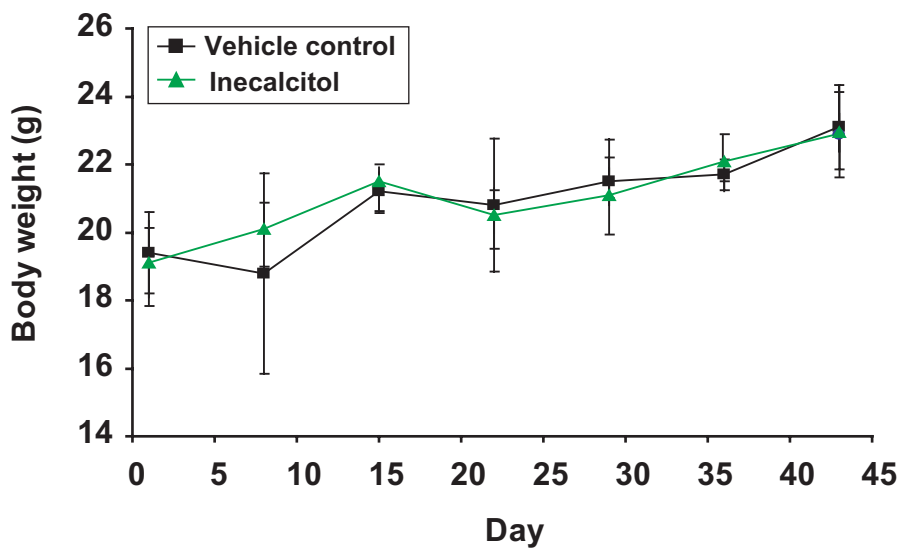

Supplement: NIHMS327716-supplement-Supp_Fig_S4.pdf [file NIHMS327716-supplement-Supp_Fig_S4.pdf]
